# Supplementary material
Source: PubMed Central journal article supplement (PMC553293)

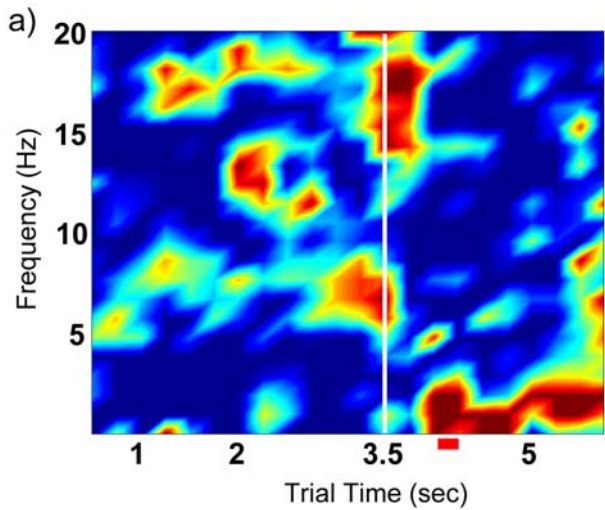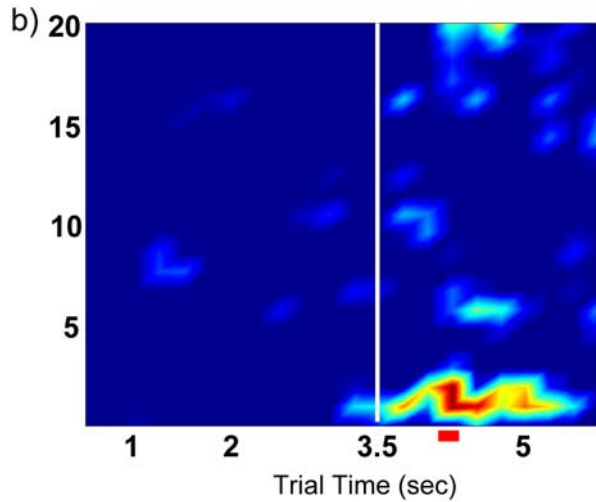

Supplement: pnas_102_10_3863__2.pdf [file pnas_102_10_3863__2.pdf]

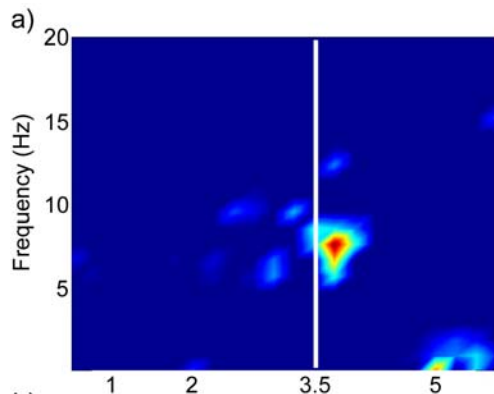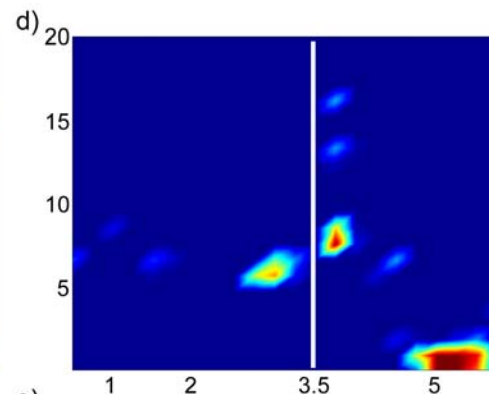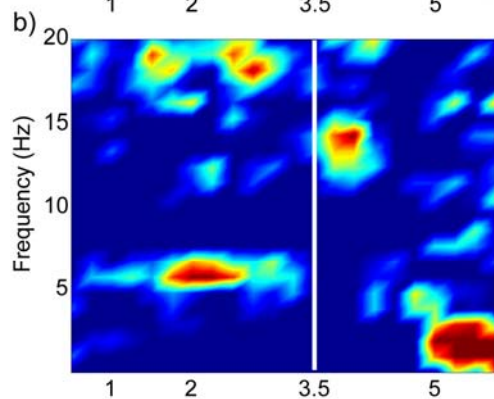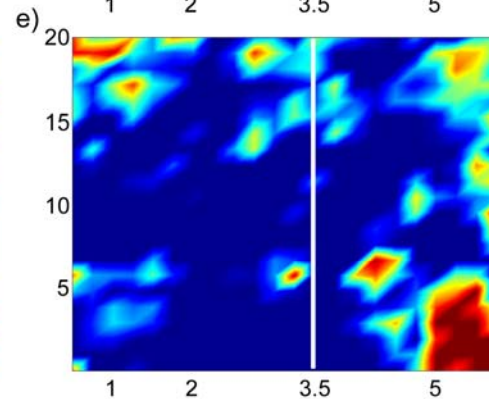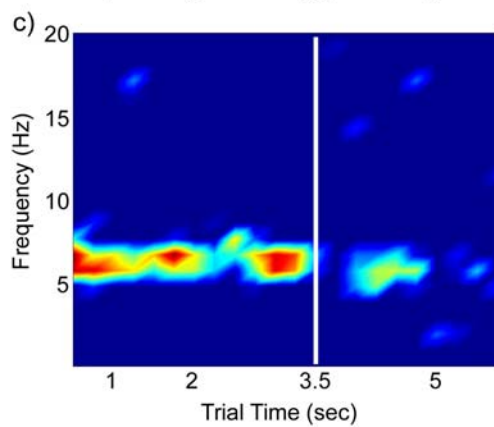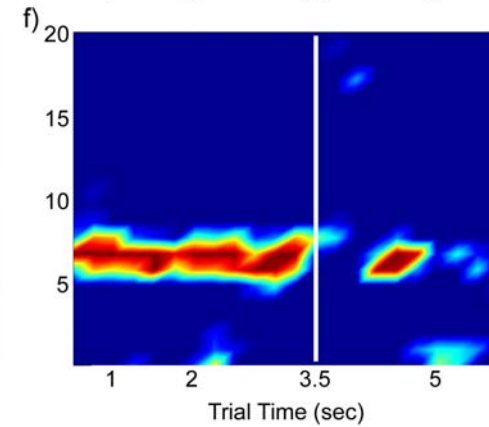

Supplement: pnas_102_10_3863__3.pdf [file pnas_102_10_3863__3.pdf]

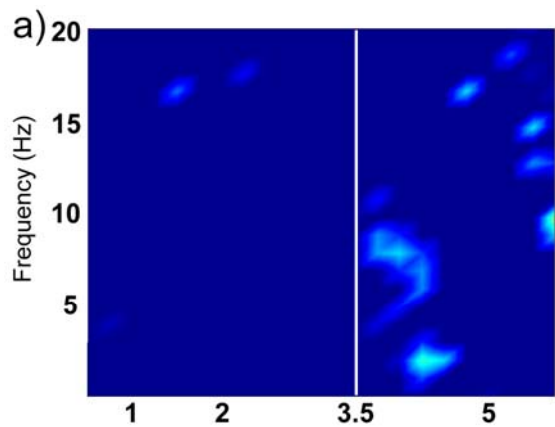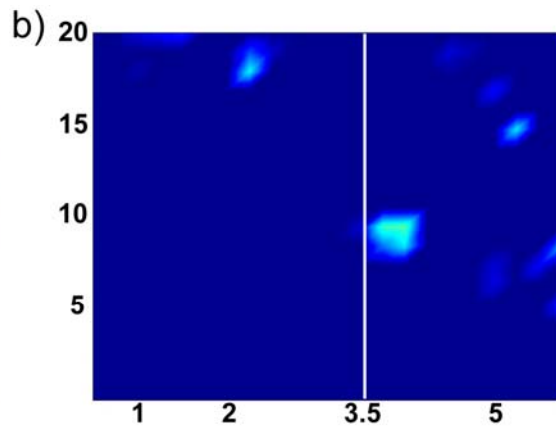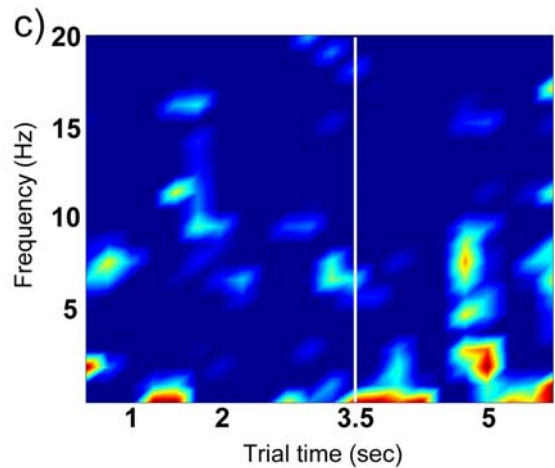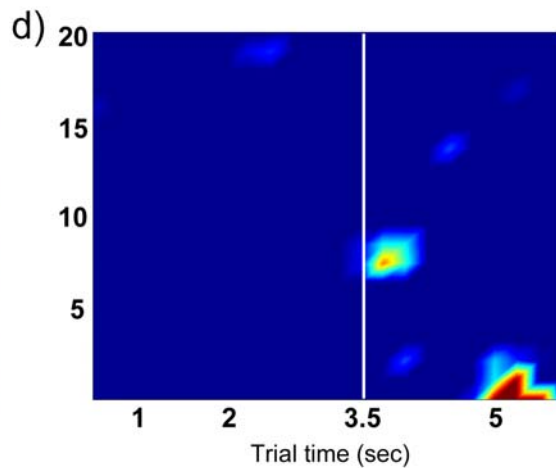

Supplement: pnas_102_10_3863__4.pdf [file pnas_102_10_3863__4.pdf]

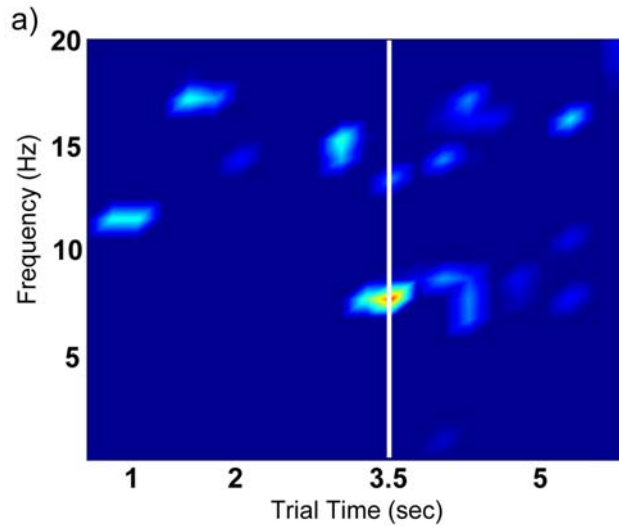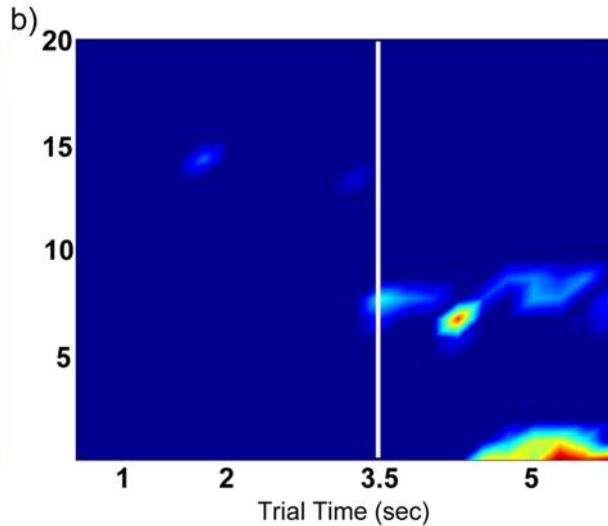

Supplement: pnas_102_10_3863__5.pdf [file pnas_102_10_3863__5.pdf]

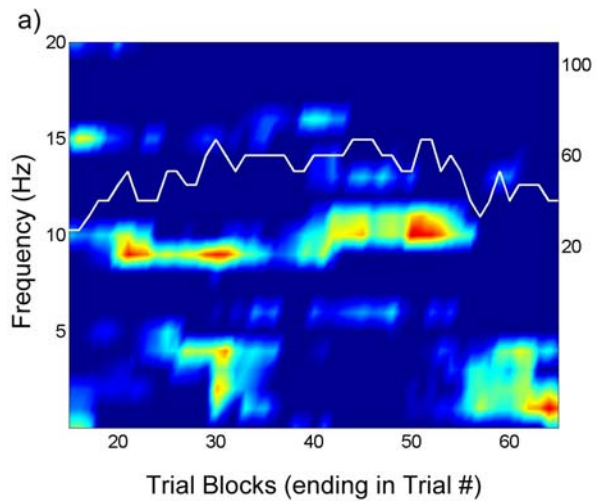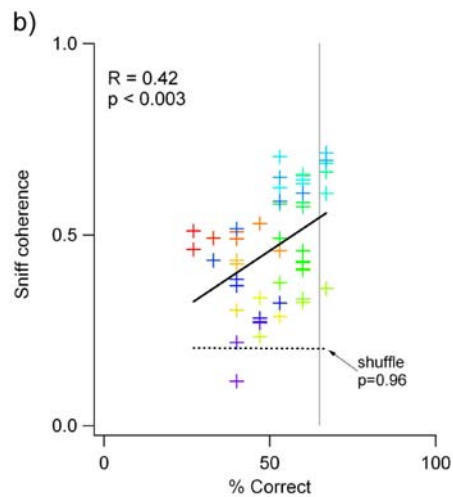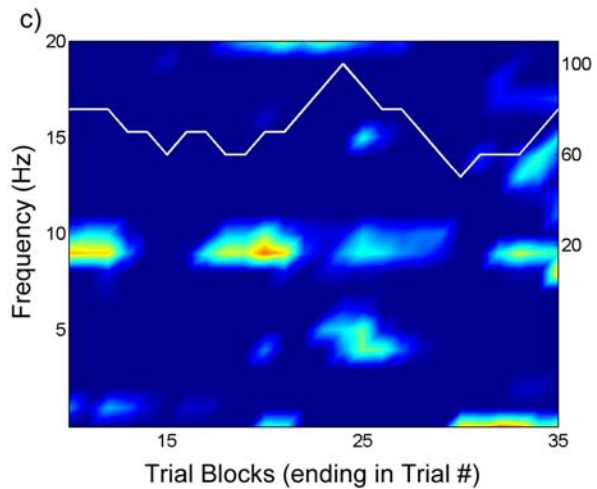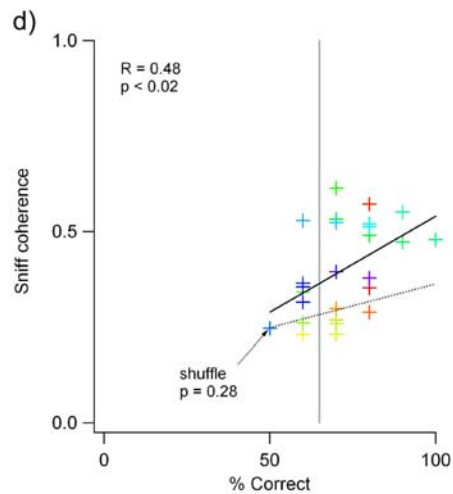

Supplement: pnas_102_10_3863__6.pdf [file pnas_102_10_3863__6.pdf]
